# Supplementary material for: Polyfunctionality of ‘Give’ in Hui Varieties of Chinese: A Typological and Areal Perspective
Source: MDPI journal article supplement (doi:10.3390/languages8030217), 2023-09-15
Supplement: s1 [file s1]

Table S1: Polyfunctionality of ‘give’ in Hui Chinese

| Datapoint             | Chinese Names | Code  | Subgroup | Give                           | Rpt | Ben <sup>note1</sup> | PERM | PASS | DISP <sup>note2</sup> | PURP <sup>note3</sup> | LOC/ALL<br>‘at/’ ‘to’ | TEMP<br>‘till’ | IMP |
|-----------------------|---------------|-------|----------|--------------------------------|-----|----------------------|------|------|-----------------------|-----------------------|-----------------------|----------------|-----|
| Xianggao<br>(Shexian) | 歙縣向杲          | Hui1  | Jishe    | $k\gamma^{35}$ or $ket^{35}$   | +   | -                    | *    | +    | -                     | *                     | -                     | -              | +   |
| Huayang(Jixi)         | 績溪華陽鎮         | Hui2  | Jishe    | $x\tilde{a}^{53}$              | +   | -                    | +    | +    | -                     | *                     | -                     | -              | -   |
| Jingzhou (Jixi)       | 績溪荊州          | Hui3  | Jishe    | $xe^{35}$                      | +   | -                    | +    | +    | -                     | *                     | -                     | -              | -   |
| Sanyang<br>(Shexian)  | 歙縣三陽          | Hui4  | Jishe    | $x\beta^{33}$ or<br>$xan^{33}$ | +   | -                    | *    | +    | -                     | *                     | -                     | -              | ?   |
| Chengkan<br>(Shexian) | 歙縣呈坎          | Hui5  | Jishe    | $xe^{42}$                      | +   | -                    | *    | +    | -                     | *                     | -                     | -              | ?   |
| Daguyun<br>(Shexian)  | 歙縣大谷運         | Hui6  | Jishe    | $x\gamma^{31}$                 | +   | -                    | *    | +    | -                     | *                     | -                     | -              | ?   |
| Tangkou               | 湯口            | Hui7  | Jishe    | $x\alpha^{31}$                 | +   | -                    | *    | +    | -                     | *                     | -                     | -              | -   |
| Huicheng<br>(Shexian) | 歙縣徽城          | Hui8  | Jishe    | $xe^{31}$                      | +   | -                    | +    | +    | -                     | *                     | -                     | -              | ?   |
| Hongtan<br>(Yixian)   | 黟縣宏潭          | Hui9  | Xiuyi    | $x\beta^{55}$                  | +   | -                    | *    | +    | -                     | *                     | -                     | -              | -   |
| Haiyang<br>(Xiuning)  | 休寧海陽          | Hui10 | Xiuyi    | $te^{55}$                      | +   | -                    | +    | +    | +                     | *                     | *                     | *              | ?   |
| Xikou<br>(Xiuning)    | 休寧溪口          | Hui11 | Xiuyi    | $ti^{55}$                      | +   | -                    | *    | +    | -                     | *                     | *                     | *              | ?   |
| Tunxi<br>(Huangshan)  | 屯溪            | Hui12 | Xiuyi    | $ti^{42}$                      | +   | -                    | +    | +    | -                     | +                     | +                     | +              | ?   |

|                        |       |       |          |                   |   |   |   |   |   |   |   |   |   |
|------------------------|-------|-------|----------|-------------------|---|---|---|---|---|---|---|---|---|
| Liukou<br>(Xiuing)     | 休寧流口  | Hui13 | Xiuyi    | $pr^{33}$         | + | - | * | + | + | * | - | - | ? |
| Biyang<br>(Yixian)     | 黟縣碧陽  | Hui14 | Xiuyi    | $pei^{31}$        | + | + | + | + | + | * | - | - | ? |
| Qishan(Qimen)          | 祁門祁山鎮 | Hui15 | Qiwu     | $f\tilde{a}^{11}$ | + | - | + | + | + | * | - | - | ? |
| Ruokeng<br>(Qimen)     | 祁門箬坑  | Hui16 | Qiwu     | $f\tilde{A}^{11}$ | + | ? | * | + | - | * | - | - | ? |
| Ziyang<br>(Wuyuan)     | 婺源紫陽  | Hui17 | Qiwu     | $tom^{44}$        | - | - | * | + | - | * | - | - | ? |
| Fuliang                | 浮梁    | Hui18 | Qiwu     | $to^{55}$         | + | ? | * | + | + | * | - | - | ? |
| Kengtou<br>(Wuyuan)    | 婺源坑頭  | Hui19 | Qiwu     | $kA^{52}$         | + | - | * | + | - | * | - | - | - |
| Qiukou<br>(Wuyuan)     | 婺源秋口  | Hui20 | Qiwu     | $ka^{55}$         | + | - | * | + | - | + | - | - | ? |
| Anling<br>(Qimen)      | 祁門安凌  | Hui21 | Jingzhan | $x\tilde{e}^{21}$ | + | - | * | + | - | * | - | - | ? |
| Jingde                 | 旌德    | Hui22 | Jingzhan | $pae^{213}$       | + | + | * | + | + | * | - | - | ? |
| Zhanda                 | 占大    | Hui23 | Jingzhan | $p\sigma^{35}$    | + | + | * | + | + | * | - | - | ? |
| Suian<br>(Yanzhou)     | 嚴州遂安  | Hui24 | Yanzhou  | $n^{422}$         | + | + | - | - | + | * | - | - | ? |
| Jiande<br>(Yanzhou)    | 嚴州建德  | Hui25 | Yanzhou  | $po^{55}$         | + | + | * | + | + | * | - | - | ? |
| Shouchang<br>(Yanzhou) | 嚴州壽昌  | Hui26 | Yanzhou  | $nu\partial^{11}$ | + | - | - | - | - | * | - | - | ? |
| Chun'an<br>(Yanzhou)   | 嚴州淳安  | Hui27 | Yanzhou  | $la^{53}$         | + | + | - | - | + | * | - | - | ? |

\*Suggests that we believe this function exists in a designated variety, although corresponding data is not available in the

Note1: BEN: preverbal SVCs

Note 2: Disposal: Pretransitive disposal marker

Note 3: PURP for (pivotal construction)
